# Supplementary material for: Pain sensitivity in young adults with juvenile idiopathic arthritis: a quantitative sensory testing study
Source: PubMed Central journal article supplement (PMC7643261; doi:10.1186/s13075-020-02345-2), 2020-11-05
Supplement: 13075_2020_2345_MOESM1_ESM.pdf [file 13075_2020_2345_MOESM1_ESM.pdf]

**Supplementary Table S1.** Thermal detection thresholds among juvenile idiopathic arthritis (JIA) and controls\*

|                                 | n   | Cold detection threshold         |                                  | Warm detection threshold          |                                   |
|---------------------------------|-----|----------------------------------|----------------------------------|-----------------------------------|-----------------------------------|
|                                 |     | Decrease below 32°C (95% CI)     |                                  | Increase above 32°C (95% CI)      |                                   |
|                                 |     | Upper limb                       | Lower limb                       | Upper limb                        | Lower limb                        |
| Control                         | 109 | 1.2 (1.1, 1.3)                   | 2.0 (1.9, 2.2)                   | 2.1 (2.0, 2.2)                    | 4.1 (3.8, 4.4)                    |
| JIA (total group) <sup>a</sup>  | 96  | 1.2 (1.1, 1.3)<br><i>p = 0.6</i> | 2.0 (1.8, 2.2)<br><i>p = 0.6</i> | 2.2 (2.1, 2.4)<br><i>p = 0.2</i>  | 4.6 (4.2, 4.9)<br><i>p = 0.03</i> |
| JIA                             |     |                                  |                                  |                                   |                                   |
| Remission off med. <sup>b</sup> | 43  | 1.3 (1.1, 1.4)<br><i>p = 0.3</i> | 2.1 (1.8, 2.4)<br><i>p = 0.8</i> | 2.1 (1.9, 2.3)<br><i>p = 1.0</i>  | 4.7 (4.0, 5.3)<br><i>p = 0.09</i> |
| Inactive disease <sup>b</sup>   | 20  | 1.2 (1.0, 1.3)<br><i>p = 0.9</i> | 1.9 (1.6, 2.2)<br><i>p = 0.4</i> | 2.3 (2.0, 2.7)<br><i>p = 0.2</i>  | 4.4 (3.7, 5.1)<br><i>p = 0.5</i>  |
| Active disease <sup>b</sup>     | 33  | 1.1 (1.0, 1.3)<br><i>p = 0.7</i> | 1.9 (1.6, 2.2)<br><i>p = 0.5</i> | 2.3 (2.1, 2.5)<br><i>p = 0.09</i> | 4.6 (4.2, 5.0)<br><i>p = 0.04</i> |

\*Multilevel modelling with re-transformed logarithm predicted values as difference in temperature from baseline (32°C) with 95% CI, adjusted for age and sex.

°C = degrees Celsius; CI = confidence interval; *p* = *p*-value comparing controls with JIA disease group (either total group or according to disease status).

<sup>a</sup>Separate multilevel model of the total JIA cohort.

<sup>b</sup>Disease status according to the definition by Wallace et al.; Remission off med. = Remission off medication for ≥12 months. Inactive disease = inactive disease on medication for less than 6 months or inactive disease off medication for less than 12 months or remission on medication (inactive disease on medication for more than 6 months). Active disease = flare or continuous active disease.
