# Supplementary material for: Pain sensitivity in young adults with juvenile idiopathic arthritis: a quantitative sensory testing study
Source: PubMed Central journal article supplement (PMC7643261; doi:10.1186/s13075-020-02345-2), 2020-11-05
Supplement: 13075_2020_2345_MOESM2_ESM.pdf [file 13075_2020_2345_MOESM2_ESM.pdf]

**Supplementary Table S2.** Median thermal and pressure pain thresholds in juvenile idiopathic arthritis (JIA) and controls

|                               | n   | Cold pain threshold <sup>a</sup> |                  | Heat pain threshold     |                  | Pressure pain threshold |               |
|-------------------------------|-----|----------------------------------|------------------|-------------------------|------------------|-------------------------|---------------|
|                               |     | Absolute temperature °C          |                  | Absolute temperature °C |                  | Kilopascal              |               |
|                               |     | Upper limb                       | Lower limb       | Upper limb              | Lower limb       | Upper limb              | Lower limb    |
| Control                       | 109 | 17.4 (10.0-24.2)                 | 15.4 (5.9-23.0)  | 45.1 (41.6-47.2)        | 45.1 (43.2-46.8) | 998 (918-1130)          | 721 (627-905) |
| JIA (total group)             | 96  | 19.1 (6.9-25.8)                  | 16.6 (5.3-25.0)  | 44.7 (40.0-47.1)        | 44.8 (42.3-46.8) | 890 (750-1014)          | 657 (579-793) |
| JIA                           |     |                                  |                  |                         |                  |                         |               |
| Rem. off med. <sup>b</sup>    | 43  | 17.1 (5.8-24.6)                  | 13.8 (5.1-25.0)  | 44.7 (39.3-47.3)        | 45.9 (42.0-47.9) | 912 (785-1067)          | 702 (586-878) |
| Inactive disease <sup>b</sup> | 20  | 20.5 (14.1-26.7)                 | 23.0 (15.7-26.2) | 44.4 (41.0-46.8)        | 43.3 (42.3-46.4) | 818 (692-948)           | 617 (501-656) |
| Active disease <sup>b</sup>   | 33  | 18.1 (6.5-26.3)                  | 13.8 (5.3-24.6)  | 44.9 (43.0-46.9)        | 44.9 (42.6-46.6) | 910 (749-994)           | 697 (584-822) |

Values are in median (interquartile range (IQR) 1<sup>th</sup>-3<sup>rd</sup>); °C = degrees Celsius; n = numbers.

<sup>a</sup>Due to the 5°C floor temperature of the equipment, a substantial number of CPT responses reached this limit and were censored. The number (%) of censored CPT in JIA was 212 (28%) and in controls 198 (23%). Thus, median CPTs are underestimated compared to predicted values from the multilevel modelling in Table 3.

<sup>b</sup>Disease status according to the definition by Wallace et al.; Remission off med. = remission off medication for ≥12 months. Inactive disease = inactive disease on medication for less than 6 months or inactive disease off medication for less than 12 months or remission on medication (inactive disease on medication for more than 6 months). Active disease = flare or continuous active disease.
