# Supplementary material for: Pain sensitivity in young adults with juvenile idiopathic arthritis: a quantitative sensory testing study
Source: PubMed Central journal article supplement (PMC7643261; doi:10.1186/s13075-020-02345-2), 2020-11-05
Supplement: 13075_2020_2345_MOESM3_ESM.pdf [file 13075_2020_2345_MOESM3_ESM.pdf]

**Supplementary Table S3.** Estimated differences in pain threshold per unit score in self-reported VAS pain

|                                                   | n   | Upper Limb                                |                 |     | Lower Limb                                |                 |     |
|---------------------------------------------------|-----|-------------------------------------------|-----------------|-----|-------------------------------------------|-----------------|-----|
|                                                   |     | Difference in pain threshold <sup>a</sup> |                 |     | Difference in pain threshold <sup>a</sup> |                 |     |
|                                                   |     | 95% CI                                    | p               |     | 95% CI                                    | p               |     |
| <b>VAS current joint-related pain<sup>b</sup></b> |     |                                           |                 |     |                                           |                 |     |
| Cold pain threshold (CPT)                         |     |                                           |                 |     |                                           |                 |     |
| All participants                                  | 204 | 0.19                                      | -0.91 to 1.28   | 0.7 | -0.28                                     | -1.38 to 0.82   | 0.6 |
| Controls                                          | 109 | -0.79                                     | -2.70 to 1.12   | 0.4 | -1.02                                     | -2.93 to 0.89   | 0.3 |
| JIA                                               | 95  | 0.51                                      | -0.98 to 2.00   | 0.5 | -0.02                                     | -1.52 to 1.48   | 1.0 |
| Heat pain threshold (HPT)                         |     |                                           |                 |     |                                           |                 |     |
| All participants                                  | 204 | 0.01                                      | -0.33 to 0.36   | 0.9 | -0.02                                     | -0.29 to 0.26   | 0.9 |
| Controls                                          | 109 | -0.18                                     | -0.74 to 0.38   | 0.5 | -0.27                                     | -0.69 to 0.15   | 0.2 |
| JIA                                               | 95  | 0.16                                      | -0.30 to 0.62   | 0.5 | 0.11                                      | -0.22 to 0.44   | 0.5 |
| Pressure pain threshold (PPT)                     |     |                                           |                 |     |                                           |                 |     |
| All participants                                  | 204 | -8.47                                     | -26.41 to 9.46  | 0.4 | -6.56                                     | -23.60 to 10.48 | 0.5 |
| Controls                                          | 109 | 3.78                                      | -14.12 to 21.68 | 0.7 | -12.18                                    | -41.35 to 16.98 | 0.4 |
| JIA                                               | 95  | 5.48                                      | -17.34 to 28.30 | 0.6 | 2.07                                      | -19.57 to 23.71 | 0.9 |
| <b>VAS disease-related pain<sup>c</sup> (JIA)</b> |     |                                           |                 |     |                                           |                 |     |
| Cold pain threshold (CPT)                         | 96  | 0.03                                      | -0.09 to 0.14   | 0.7 | 0.03                                      | -0.09 to 0.15   | 0.6 |
| Heat pain threshold (HPT)                         | 96  | 0.03                                      | -0.01 to 0.06   | 0.1 | 0.01                                      | -0.01 to 0.04   | 0.3 |
| Pressure pain threshold (PPT)                     | 96  | -0.05                                     | -2.01 to 1.92   | 1.0 | -0.40                                     | -2.15 to 1.35   | 0.7 |

VAS = Visual analogue scale; n = numbers; CI = Confidence interval; p = p-value; JIA = Juvenile idiopathic arthritis.

<sup>a</sup>Regression coefficient representing difference in °C for CPT/HPT and kilopascal for PPT per unit change in VAS current joint-related pain/VAS disease-related pain.

<sup>b</sup>Self-reported current joint-related pain on the day of visit, measured with 10 cm continuous VAS (0 = no pain, 10 = unbearable pain).

<sup>c</sup>Self-reported disease-related pain during the last week measured with 21 numbered 0-10 VAS (0 = no pain, 10 = unbearable pain).
