# Supplementary material for: Pain sensitivity in young adults with juvenile idiopathic arthritis: a quantitative sensory testing study
Source: PubMed Central journal article supplement (PMC7643261; doi:10.1186/s13075-020-02345-2), 2020-11-05
Supplement: 13075_2020_2345_MOESM4_ESM.pdf [file 13075_2020_2345_MOESM4_ESM.pdf]

**Supplementary Table S4.** Estimated differences in pain threshold: mild *versus* severe pain intensity / low *versus* high pain interference

|                                      | n   | Upper Limb                                |                  |     | Lower Limb                                |                   |     |
|--------------------------------------|-----|-------------------------------------------|------------------|-----|-------------------------------------------|-------------------|-----|
|                                      |     | Difference in pain threshold <sup>a</sup> | 95% CI           | p   | Difference in pain threshold <sup>a</sup> | 95% CI            | p   |
| <b>Pain intensity<sup>b</sup></b>    |     |                                           |                  |     |                                           |                   |     |
| Cold pain threshold (CPT)            |     |                                           |                  |     |                                           |                   |     |
| All participants                     | 205 | 2.00                                      | -1.67 to 5.68    | 0.3 | -1.51                                     | -5.21 to 2.19     | 0.4 |
| Controls                             | 109 | 1.95                                      | -3.14 to 7.04    | 0.5 | -3.12                                     | -8.23 to 1.99     | 0.2 |
| JIA                                  | 96  | 1.47                                      | -3.98 to 6.91    | 0.6 | -0.59                                     | -6.08 to 4.90     | 0.8 |
| Heat pain threshold (HPT)            |     |                                           |                  |     |                                           |                   |     |
| All participants                     | 205 | 0.18                                      | -0.95 to 1.32    | 0.8 | -0.02                                     | -0.92 to 0.88     | 1.0 |
| Controls                             | 109 | 0.26                                      | -1.20 to 1.72    | 0.7 | 0.50                                      | -0.70 to 1.71     | 0.4 |
| JIA                                  | 96  | 0.14                                      | -1.52 to 1.79    | 0.9 | -0.52                                     | -1.74 to 0.71     | 0.4 |
| Pressure pain threshold (PPT)        |     |                                           |                  |     |                                           |                   |     |
| All participants                     | 205 | -14.42                                    | -80.75 to 51.91  | 0.7 | -16.52                                    | -76.44 to 43.41   | 0.6 |
| Controls                             | 109 | 21.98                                     | -45.45 to 89.41  | 0.5 | 7.78                                      | -84.39 to 99.95   | 0.9 |
| JIA                                  | 96  | -7.90                                     | -103.22 to 87.41 | 0.9 | -23.23                                    | -98.07 to 51.60   | 0.5 |
| <b>Pain interference<sup>c</sup></b> |     |                                           |                  |     |                                           |                   |     |
| Cold pain threshold (CPT)            |     |                                           |                  |     |                                           |                   |     |
| All participants                     | 205 | -2.92                                     | -9.65 to 3.80    | 0.4 | -4.76                                     | -11.54 to 2.02    | 0.2 |
| Controls                             | 109 | -1.42                                     | -11.69 to 8.86   | 0.8 | -5.61                                     | -16.00 to 4.79    | 0.3 |
| JIA                                  | 96  | -3.78                                     | -12.87 to 5.31   | 0.4 | -4.01                                     | -13.15 to 5.14    | 0.4 |
| Heat pain threshold (HPT)            |     |                                           |                  |     |                                           |                   |     |
| All participants                     | 205 | -1.29                                     | -3.56 to 0.98    | 0.3 | -0.53                                     | -2.68 to 1.62     | 0.6 |
| Controls                             | 109 | -0.63                                     | -3.48 to 2.22    | 0.7 | 1.04                                      | -1.23 to 3.30     | 0.4 |
| JIA                                  | 96  | -1.46                                     | -4.67 to 1.75    | 0.4 | -1.31                                     | -4.23 to 1.62     | 0.4 |
| Pressure pain threshold (PPT)        |     |                                           |                  |     |                                           |                   |     |
| All participants                     | 205 | -46.98                                    | -129.87 to 35.92 | 0.3 | -70.01                                    | -170.32 to 30.29  | 0.2 |
| Controls                             | 109 | -29.01                                    | -110.76 to 52.75 | 0.5 | -44.80                                    | -255.10 to 165.51 | 0.7 |
| JIA                                  | 96  | -17.36                                    | -129.90 to 95.19 | 0.8 | -68.61                                    | -164.82 to 27.61  | 0.2 |

CI = Confidence interval; p = p-value; JIA = Juvenile idiopathic arthritis.

<sup>a</sup>Regression coefficient representing difference in °C for CPT/HPT and kilopascal for PPT between mild *versus* severe pain intensity and between low *versus* high pain interference.

<sup>b</sup>Self-reported body pain intensity during the last 4 weeks, measured with Short-form 36 Health Status Questionnaire (SF-36), 1-6 (1 = no pain, 6 = very severe pain), dichotomized into mild pain intensity (1-3) and severe pain intensity (4-6).

<sup>c</sup>Self-reported pain influence on daily activities during the last 4 weeks, measured with Short-form 36 Health Status Questionnaire (SF-36), 1-5 (1 = not at all, 5 = extremely), dichotomized into low pain interference (1-3) and high pain interference (5-6).
